# Supplementary material for: Ruscogenin Attenuates Ulcerative Colitis in Mice by Inhibiting Caspase-1-Dependent Pyroptosis via the TLR4/NF-κB Signaling Pathway
Source: MDPI journal article supplement (doi:10.3390/biomedicines12050989), 2024-04-30
Supplement: s1 [file s1]

## Additional file S1

Table S1. Primers used in qPCR

Table S2. Antibodies

**Table S1. Primers used in qPCR**

| Gene                 | Forward Primer (5'→3')  | Reverse Primer (5'→3')   |
|----------------------|-------------------------|--------------------------|
| Mouse TNF- $\alpha$  | CGACGTGGAAGTGGCAAGAA    | GGACCGATCACCCCGAAG       |
| Mouse IL-6           | CTGCAAGAGACTTCCATCCAG   | AGTGGTATAGA-CAGGTCTGTTGG |
| Mouse MCP-1          | CTGTGCTGACCCCAAGAAGG    | AGGTGGTTGTGGAAAAGGTAGTG  |
| Mouse IL-1 $\beta$   | ATGCCACCTTTTGACAGTGATG  | TGATGTGCTGCTGCGAGATT     |
| Mouse IL-18          | AAGGACACTTTCTTGCTTGCC   | GCCTCGGGTATTCTGTTATGG    |
| Mouse NLRP3          | ATTACCCGCCCAGAGAAAGG    | TCGACAGCAAAGATCCACACAG   |
| Mouse ASC            | CTTGTCAGGGGATGAACTCAAAA | GCCATACGACTCCAGATAGTAGC  |
| Mouse GSDMD          | AGGTGACAGAAAAGCAGTGGG   | GCTGGGCTGGTCCTGTAAAAT    |
| Mouse Caspase-1      | ACATCTTTCTCCGAGGGTTGG   | TCTGGGCAGGCAGCAAAT       |
| Mouse GSDMD          | AGGTGACAGAAAAGCAGTGGG   | GCTGGGCTGGTCCTGTAAAAT    |
| Mouse TLR4           | GCCTTTCAGGGAATTAAGCTCC  | GATCAACCGATGGACGTGTAAA   |
| Mouse NF- $\kappa$ B | GGAGGCATGTTTCGGTAGTGG   | CCCTGCGTTGGATTTCGTG      |
| Mouse ZO1            | GCCGCTAAGAGCACAGCAA     | TCCCCACTCTGAAAAATGAGGA   |
| Mouse E-cadherin     | CAGGTCTCCTCATGGCTTTGC   | CTTCCGAAAAGAAGGCTGTCC    |
| Mouse Occludin       | TGAAAGTCCACCTCCTTACAGA  | CCGGATAAAAAGAGTACGCTGG   |
| Mouse GAPDH          | AGGTCGGTGTGAACGGATTTG   | TGTAGACCATGTAGTTGAGGTCA  |
| Human TNF- $\alpha$  | CCTCTCTCTAATCAGCCCTCTG  | GAGGACCTGGGAGTAGATGAG    |
| Human IL-6           | CGGACAGCTTGAACAGAATGT   | ACCATCCCACTCACACCTCA     |
| Human MCP-1          | CAGCCAGATGCAATCAATGCC   | TGGAATCCTGAACCCACTTCT    |
| Human IL-1 $\beta$   | ATGATGGCTTATTACAGTGGCAA | GTCCGAGATTCTGTAGCTGGA    |
| Human IL-18          | TCTTCATTGACCAAGGAAATCGG | TCCGGGGTGCATTATCTCTAC    |

|                      |                         |                         |
|----------------------|-------------------------|-------------------------|
| Human NLRP3          | CGTGAGTCCCATTAAGATGGAGT | CCCGACAGTGGATATAGAACAGA |
| Human ASC            | TGGATGCTCTGTACGGGAAG    | CCAGGCTGGTGTGAAACTGAA   |
| Human Caspase-1      | TTGAAGGACAAACCGAAGGTG   | GTGGAAGAGCAGAAAGCGATAA  |
| Human GSDMD          | GTGTGTCAACCTGTCTATCAAGG | CATGGCATCGTAGAAGTGGAAG  |
| Human Caspase-4      | CAGCACAATGGGCTCTATCTTC  | GGACAGTCGTTCTATGGTGGG   |
| Human TLR4           | CCTCGGCGGCAACTTCATAA    | AGAGCGGATCTGGTTGTACTG   |
| Human NF- $\kappa$ B | GGTGCGGCTCATGTTTACAG    | GATGGCGTCTGATACCACGG    |
| Human ZO1            | CAACATACAGTGACGCTTCACA  | CACTATTGACGTTTCCCCACTC  |
| Human E-cadherin     | CGAGAGCTACACGTTCACGG    | GGGTGTCGAGGGAAAAATAGG   |
| Human Occludin       | GGCACCTGCATACTCACCC     | CTGGGAGAGCAACTCATCCTC   |
| Human GAPDH          | ACAAC TTTGGTATCGTGGAAGG | GCCATCACGCCACAGTTTC     |

---

**Table S2. Antibodies**

| Antibodies                                               | Application              | Cat.       | Company     |
|----------------------------------------------------------|--------------------------|------------|-------------|
| GAPDH                                                    | WB (1:1000)              | #2118S     | CST         |
| IL-1 $\beta$                                             | WB (1:1000)              | ab254360   | Abcam       |
| $\beta$ -Actin                                           | WB (1:1000)              | #4970S     | CST         |
| NLRP3                                                    | WB (1:1000) , IF (1:200) | ab263899   | Abcam       |
| Caspase-1                                                | WB (1:1000)              | ab179515   | Abcam       |
| ASC                                                      | WB (1:1000)              | ab309497   | Abcam       |
| GSDMD                                                    | WB (1:1000), IF (1:200)  | ab219800   | Abcam       |
| TLR4                                                     | WB (1:1000)              | 66350-1-Ig | Proteintech |
| NF-kB p65                                                | WB (1:1000)              | ab32536    | Abcam       |
| Caspase-4                                                | WB (1:1000)              | ab238124   | Abcam       |
| ZO1                                                      | WB (1:1000), IF (1:100)  | ab276131   | Abcam       |
| E-cadherin                                               | WB (1:1000), IF (1:1000) | ab231303   | Abcam       |
| Occludin                                                 | WB (1:1000), IF (1:100)  | ab216327   | Abcam       |
| TLR4                                                     | WB (1:1000)              | ab13556    | Abcam       |
| HRP Goat Anti-Rabbit IgG H&L                             | WB (1:2000)              | #7077S     | CST         |
| HRP Goat Anti-Mouse IgG H&L                              | WB (1:2000)              | #7076S     | CST         |
| Goat Anti-Rabbit IgG H&L<br>(Alexa Fluor® 488 Conjugate) | IF (1:500)               | ab150077   | Abcam       |
| Goat Anti-Rabbit IgG H&L<br>(Alexa Fluor® 647 Conjugate) | IF (1:500)               | ab150075   | Abcam       |
| Goat Anti-Rabbit IgG H&L<br>(Alexa Fluor® 594 Conjugate) | IF (1:500)               | A11037     | Invitrogen  |
| Goat Anti-Mouse IgG H&L<br>(Alexa Fluor® 488 Conjugate)  | IF (1:500)               | A11001     | Invitrogen  |

CST, Cell Signaling Technology
